# Supplementary material for: Development of predictive prognostic nomogram for NECs of rectum on population-based exploration
Source: PubMed Central journal article supplement — Endocr Connect. 2018 Sep 20;7(11):1178–85. doi: 10.1530/EC-18-0353 (PMC6215795; doi:10.1530/ec-18-0353), 2018-09-20
Supplement: ec-7-1178-s001.pdf [file ec-7-1178-s001.pdf]

This is the specific R code for the formulation of our nomogram.

```
> library(rms)

> library(foreign)

> bc <- read.spss("D:/SEER.sav", use.value.labels=F, to.data.frame=T)

> bc <- na.omit(bc)

> dd <- datadist(bc)

> options(datadist="dd")

> f <- cph(Surv(months, status) ~ Nstage + Mstage + Grade + surgery, x=T, y=T, surv=T,
data=bc, time.inc=12)

> surv <- Survival(f)

> nom <- nomogram(f, fun=list(function(x) surv(12, x), function(x) surv(24, x), function(x)
surv(36, x)), lp=F, funlabel=c("1-year survival", "2-year survival", "3-year survival"),
maxscale=10, fun.at=c(0.95, 0.9, 0.85, 0.8, 0.75, 0.7, 0.6, 0.5))

> plot(nom) nomogram formulation completion

> validate(f, method="boot", B=1000, dxy=T)
```

|       | index.orig | training | test   | optimism | index.corrected | n    |
|-------|------------|----------|--------|----------|-----------------|------|
| Dxy   | 0.8275     | 0.8294   | 0.8252 | 0.0042   | 0.8233          | 1000 |
| R2    | 0.4337     | 0.4399   | 0.4290 | 0.0110   | 0.4228          | 1000 |
| Slope | 1.0000     | 1.0000   | 0.9665 | 0.0335   | 0.9665          | 1000 |
| D     | 0.1910     | 0.1942   | 0.1882 | 0.0060   | 0.1850          | 1000 |

```
U      -0.0007 -0.0007 0.0006 -0.0012      0.0006 1000
Q      0.1916  0.1949 0.1877  0.0072      0.1844 1000
g      1.8167  1.8540 1.7890  0.0650      1.7516 1000
```

```
> rcorrcens(Surv(months, status) ~ predict(f), data = bc)
```

```
          C   Dxy  aDxy   SD   Z P   n
predict(f) 0.086 -0.828 0.828 0.012 68.19 0 1116
```

```
>
```

```
> f1 <- cph(Surv(months, status) ~ Nstage + Mstage + Grade + surgery, x=T, y=T, surv=T,
data=bc, time.inc=12)
```

```
> cal1 <- calibrate(f1, cmethod="KM", method="boot", u=12, m=300, B=1000)
```

```
> par(mar=c(8,5,3,2),cex = 1.0)
```

```
> plot(cal1)
```

```
> f2 <- cph(Surv(months, status) ~ Nstage + Mstage + Grade + surgery, x=T, y=T, surv=T,
data=bc, time.inc=24)
```

```
> cal2 <- calibrate(f2, cmethod="KM", method="boot", u=24, m=300, B=1000)
```

```
> par(mar=c(8,5,3,2),cex = 1.0)
```

```
> plot(cal2)
```

```
> f3 <- cph(Surv(months, status) ~ Nstage + Mstage + Grade + surgery, x=T, y=T, surv=T,
data=bc, time.inc=36)
```

```
> cal3 <- calibrate(f3, cmethod="KM", method="boot", u=36, m=300, B=1000)
```

```
> plot(cal3) internal calibration curve formulation completion
```

```
> rc <- read.spss("D:/rNEC.sav", use.value.labels=F, to.data.frame=T)
```

```
> rc <- na.omit(rc)
```

```
> dd <- datadist(rc)
```

```
> bcev <- rc[1:41, c(18,21:22)]
```

```
> fev <- cph(Surv(months, status) ~ predict(f, newdata=bcev), x=T, y=T, surv=T,  
data=bcev, time.inc=12)
```

```
> validate(fev, method="boot", B=1000, dxy=T)
```

|       | index.orig | training | test   | optimism | index.corrected | n    |
|-------|------------|----------|--------|----------|-----------------|------|
| Dxy   | 0.8108     | 0.8106   | 0.8108 | -0.0002  | 0.8111          | 1000 |
| R2    | 0.4389     | 0.4405   | 0.4389 | 0.0016   | 0.4372          | 1000 |
| Slope | 1.0000     | 1.0000   | 0.9932 | 0.0068   | 0.9932          | 1000 |
| D     | 0.1925     | 0.1937   | 0.1925 | 0.0012   | 0.1914          | 1000 |
| U     | -0.0011    | -0.0011  | 0.0006 | -0.0017  | 0.0006          | 1000 |
| Q     | 0.1937     | 0.1948   | 0.1920 | 0.0029   | 0.1908          | 1000 |
| g     | 1.7913     | 1.8087   | 1.7913 | 0.0174   | 1.7739          | 1000 |

```
> rcorr(cens(Surv(Survivalmonths, SEERcausespecificdeathclassification) ~ predict(f,  
newdata=bcev), data = bcev)
```

|                            | C     | Dxy    | aDxy  | SD    | Z     | P | n   |
|----------------------------|-------|--------|-------|-------|-------|---|-----|
| predict(f, newdata = bcev) | 0.095 | -0.811 | 0.811 | 0.017 | 47.13 | 0 | 640 |

```
> fev1 <- cph(months, status) ~ predict(f, newdata=bcev), x=T, y=T, surv=T, data=bcev,
```

```
time.inc=12)
```

```
> calev1 <- calibrate(fev1, cmethod="KM", method="boot", u=12, m=400, B=1000)
```

```
> plot(calev1)
```

```
> fev2 <- cph(Surv(months, status) ~ predict(f, newdata=bcev), x=T, y=T, surv=T,  
data=bcev, time.inc=24)
```

```
> calev2 <- calibrate(fev2, cmethod="KM", method="boot", u=24, m=300, B=1000)
```

```
> plot(calev2)
```

```
> fev3 <- cph(Surv(months, status) ~ predict(f, newdata=bcev), x=T, y=T, surv=T,  
data=bcev, time.inc=36)
```

```
> calev3 <- calibrate(fev3, cmethod="KM", method="boot", u=36, m=300, B=1000)
```

```
> plot(calev3) external calibration curve formulation completion
```
